# Supplementary material
Source: publisher figshare collection journal article supplement (https://acs.figshare.com/ndownloader/files/4189366)
Supplement: Supplementary file 1 [file 4189366]

# **Size-Tunable Nanoparticle Synthesis by RAFT Polymerization in CO<sub>2</sub>-Induced Miniemulsions**

Siqing Cheng, S. R. Simon Ting, Frank P. Lucien, and Per B. Zetterlund\*

*Centre for Advanced Macromolecular Design (CAMD), School of Chemical Engineering*

*The University of New South Wales, Sydney, NSW 2052, Australia,*

*Tel: +61 2 9385 4331; Fax: +61 2 9385 6250*

*E-mail: [p.zetterlund@unsw.edu.au](mailto:p.zetterlund@unsw.edu.au)*

\* Corresponding author

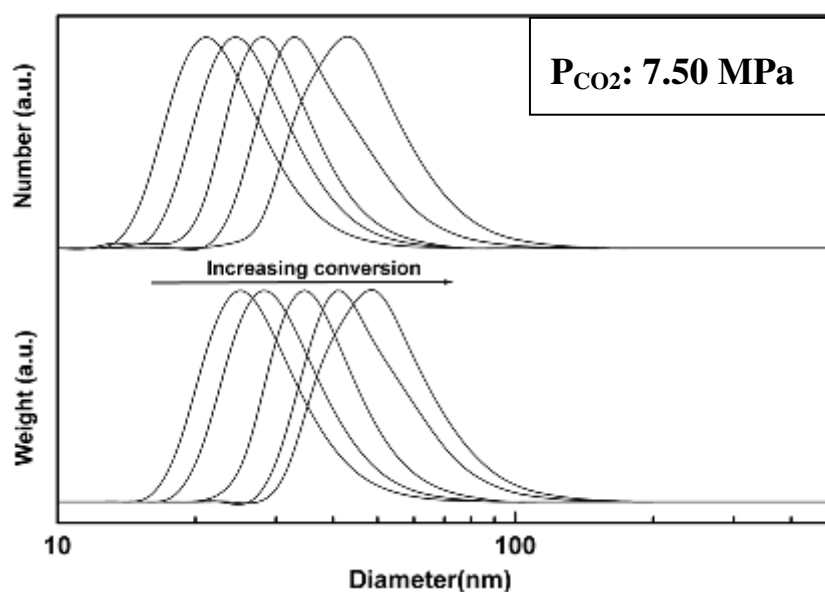

**Figure 1S.** Particle size distributions based on number and weight obtained by DLS at different conversion for CO<sub>2</sub>-induced RAFT miniemulsion polymerization of styrene initiated by VA-044 at 50 °C using Dowfax 8390 as surfactant at 7.50 MPa with [St]/[BDT] = 400 and [BDT]/[VA-044] = 3 (33 wt% Dowfax 8390 rel. St; 8 wt% HD rel. St; 11.6 wt% St rel. water).

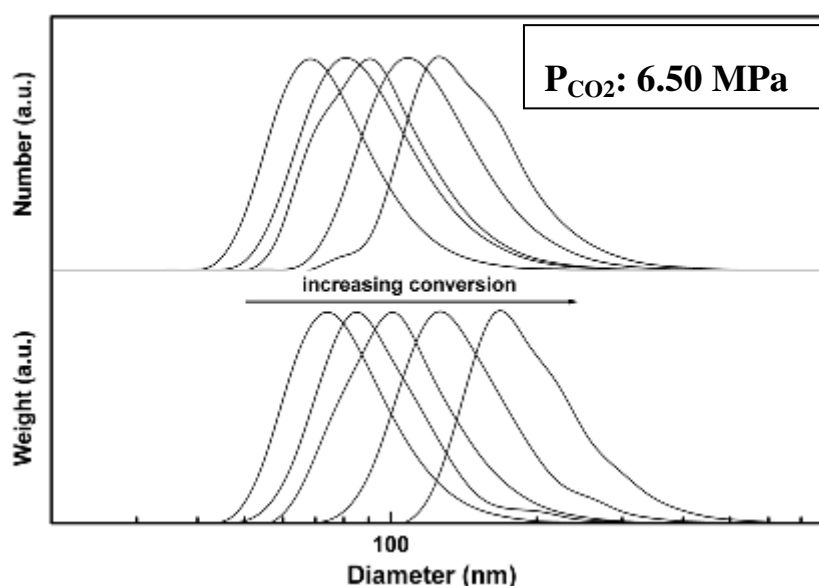

**Figure 2S.** Particle size distributions based on number and weight obtained by DLS at different conversion for CO<sub>2</sub>-induced RAFT miniemulsion polymerization of styrene initiated by VA-044 at 50 °C using Dowfax 8390 as surfactant at 6.50 MPa with [St]/[BDT] = 400 and [BDT]/[VA-044] = 3 (33 wt% Dowfax 8390 rel. St; 8 wt% HD rel. St; 11.6 wt% St rel. water).

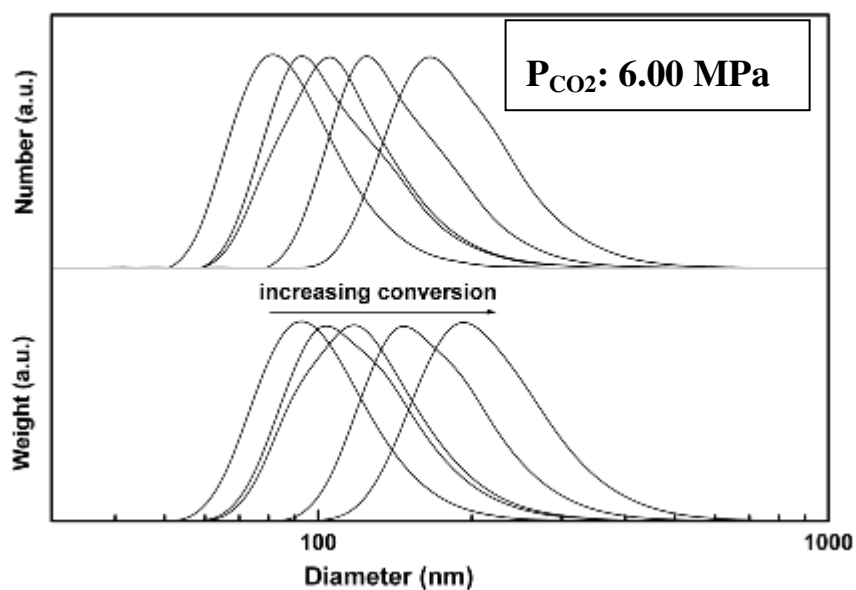

**Figure 3S.** Particle size distributions based on number and weight obtained by DLS at different conversion for CO<sub>2</sub>-induced RAFT miniemulsion polymerization of styrene initiated by VA-044 at 50 °C using Dowfax 8390 as surfactant at 6.00 MPa with [St]/[BDT] = 400 and [BDT]/[VA-044] = 3 (33 wt% Dowfax 8390 rel. St; 8 wt% HD rel. St; 11.6 wt% St rel. water).
